# Supplementary material
Source: PubMed Central journal article supplement (PMC2924679)
Supplement: NIHMS159014-supplement-2_si_002.pdf [file NIHMS159014-supplement-2_si_002.pdf]

**Supplemental Figure S1:** Comparison of MS/MS spectra of one peptide (MW 1464.8053, sequence AQIHDLVLVGGSTR) from the 70 kDa Heat shock protein 1 (P08107) extracted from RCL2/CS100-fixed (top) and frozen (bottom) colonic mucosa (A), prostate (B), and breast (C) tissue samples. The fragmentation evidence table lists the theoretical fragment ions for the peptide sequence, with the matching ions shown in bold text.

**Supplemental Figure S2:** MALDI MS protein profiles acquired from fresh-frozen and RCL2/CS100-fixed breast tumor (A) and prostate (B) sections. For the breast tumor, the cancer areas in the photomicrographs of the sections correspond to the dark purple staining.  $[\alpha+H]^+$  and  $[\beta+H]^+$  indicate the hemoglobin alpha and beta chain molecular ions, respectively.
