# Supplementary material
Source: PubMed Central journal article supplement (PMC2924679)
Supplement: NIHMS159014-supplement-3_si_003.pdf [file NIHMS159014-supplement-3_si_003.pdf]

# A, Colon

Prec. MW: 1464.7982 /  $\Delta$  Mass: -0.0001

RCL2

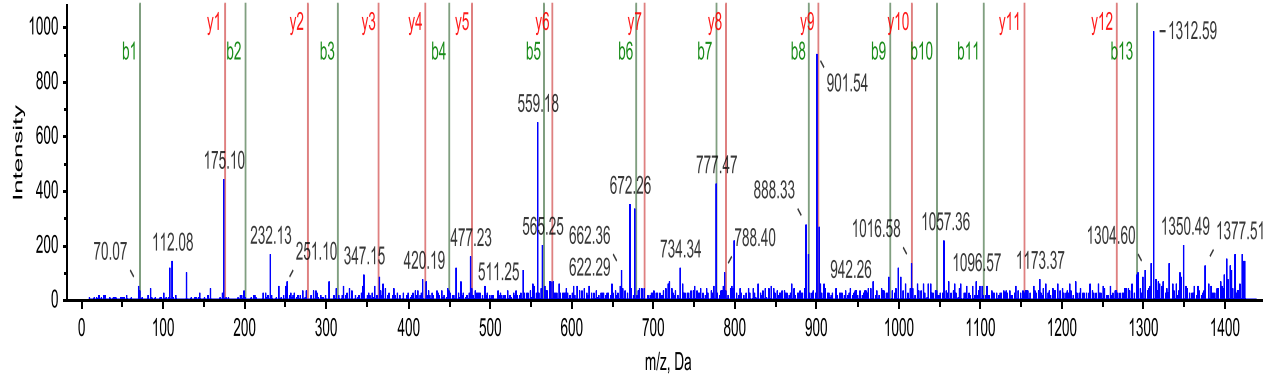

| Residue | b         | y         |
|---------|-----------|-----------|
| A       | 72.0444   | 1465.8122 |
| Q       | 200.103   | 1394.775  |
| I       | 313.187   | 1266.7165 |
| H       | 450.2459  | 1153.6324 |
| D       | 565.2729  | 1016.5735 |
| L       | 678.357   | 901.5465  |
| V       | 777.4254  | 788.4625  |
| L       | 890.5094  | 689.3941  |
| V       | 989.5778  | 576.31    |
| G       | 1046.5993 | 477.2416  |
| G       | 1103.6208 | 420.2201  |
| S       | 1190.6528 | 363.1987  |
| T       | 1291.7005 | 276.1666  |
| R       | 1447.8016 | 175.119   |

## AQIHDLVLVGGSTR

Prec. MW: 1464.8026 /  $\Delta$  Mass: -0.0022

Frozen

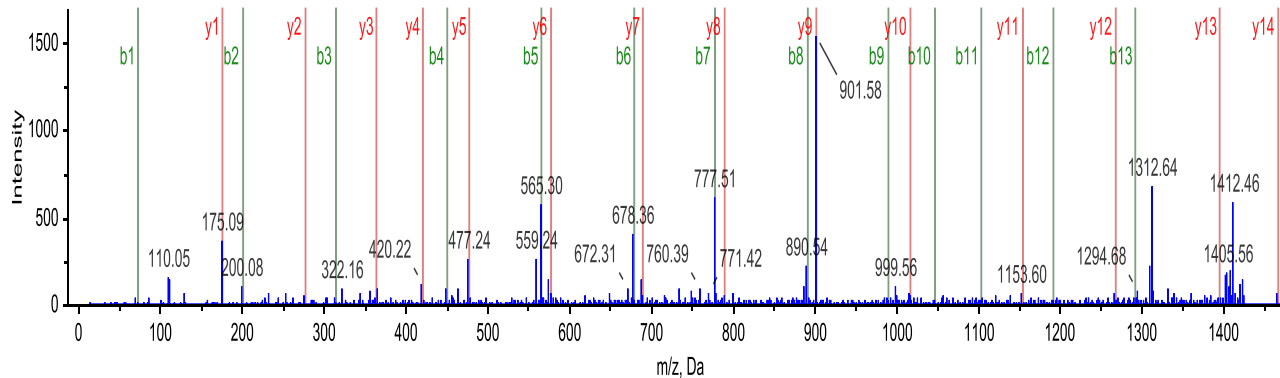

| Residue | b         | y         |
|---------|-----------|-----------|
| A       | 72.0444   | 1465.8122 |
| Q       | 200.103   | 1394.775  |
| I       | 313.187   | 1266.7165 |
| H       | 450.2459  | 1153.6324 |
| D       | 565.2729  | 1016.5735 |
| L       | 678.357   | 901.5465  |
| V       | 777.4254  | 788.4625  |
| L       | 890.5094  | 689.3941  |
| V       | 989.5778  | 576.31    |
| G       | 1046.5993 | 477.2416  |
| G       | 1103.6208 | 420.2201  |
| S       | 1190.6528 | 363.1987  |
| T       | 1291.7005 | 276.1666  |
| R       | 1447.8016 | 175.119   |

# B, Prostate

Prec. MW: 1464.7973 /  $\Delta$  Mass: -0.0076

RCL2

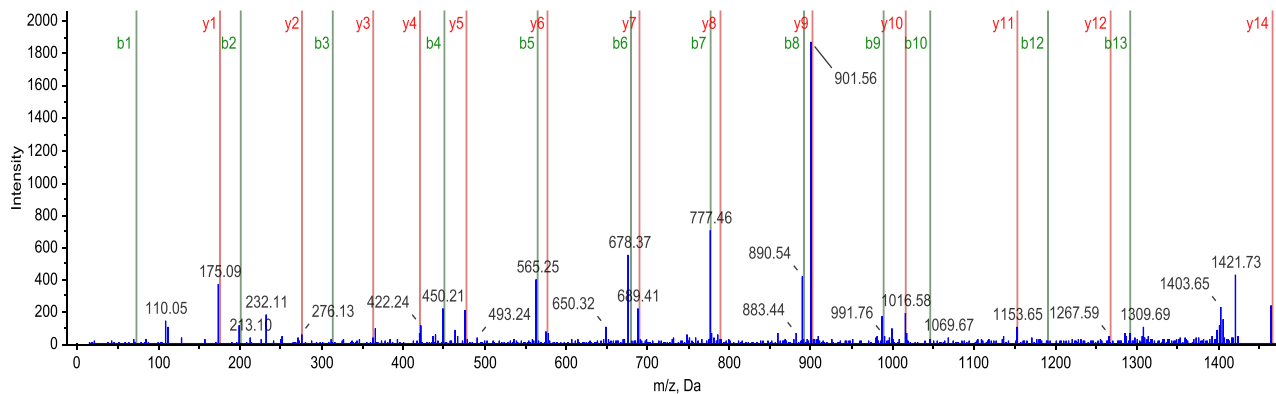

| Residue | b         | y         |
|---------|-----------|-----------|
| A       | 72.0444   | 1465.8122 |
| Q       | 200.103   | 1394.775  |
| I       | 313.187   | 1266.7165 |
| H       | 450.2459  | 1153.6324 |
| D       | 565.2729  | 1016.5735 |
| L       | 678.357   | 901.5465  |
| V       | 777.4254  | 788.4625  |
| L       | 890.5094  | 689.3941  |
| V       | 989.5778  | 576.31    |
| G       | 1046.5993 | 477.2416  |
| G       | 1103.6208 | 420.2201  |
| S       | 1190.6528 | 363.1987  |
| T       | 1291.7005 | 276.1666  |
| R       | 1447.8016 | 175.119   |

## AQIHDLVLVGGSTR

Prec. MW: 1464.8143 /  $\Delta$  Mass: 0.0094

Frozen

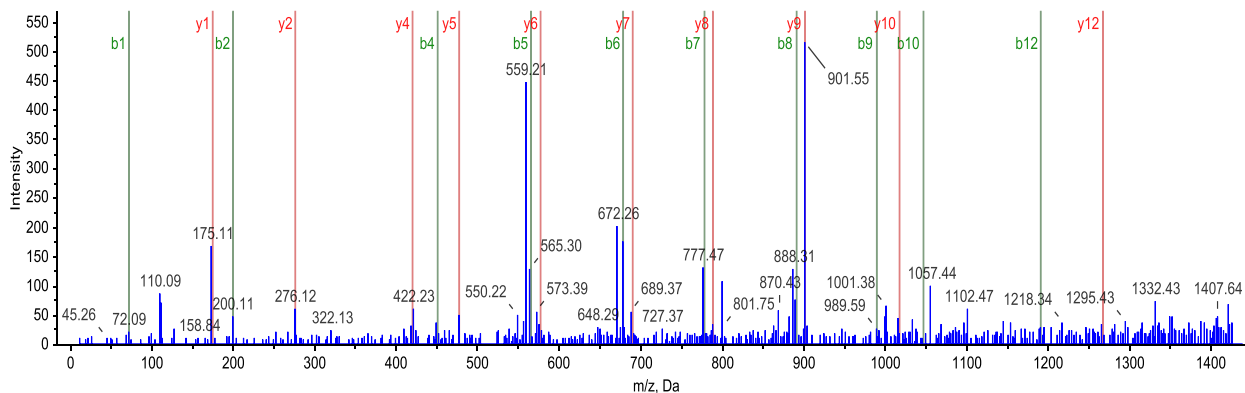

| Residue | b         | y         |
|---------|-----------|-----------|
| A       | 72.0444   | 1465.8122 |
| Q       | 200.103   | 1394.775  |
| I       | 313.187   | 1266.7165 |
| H       | 450.2459  | 1153.6324 |
| D       | 565.2729  | 1016.5735 |
| L       | 678.357   | 901.5465  |
| V       | 777.4254  | 788.4625  |
| L       | 890.5094  | 689.3941  |
| V       | 989.5778  | 576.31    |
| G       | 1046.5993 | 477.2416  |
| G       | 1103.6208 | 420.2201  |
| S       | 1190.6528 | 363.1987  |
| T       | 1291.7005 | 276.1666  |
| R       | 1447.8016 | 175.119   |

# C, Breast

Prec. MW: 1464.8087 /  $\Delta$  Mass: 0.0039

RCL2

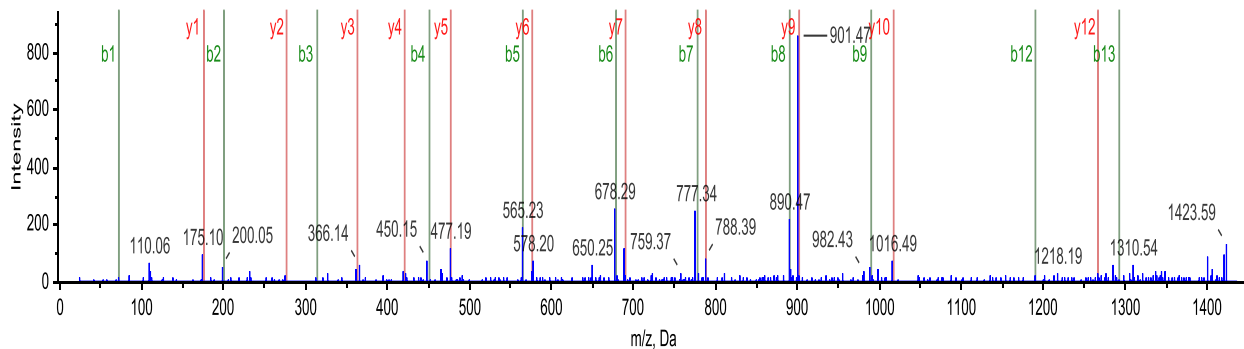

| Residue | b         | y         |
|---------|-----------|-----------|
| A       | 72.0444   | 1465.8122 |
| Q       | 200.103   | 1394.775  |
| I       | 313.187   | 1266.7165 |
| H       | 450.2459  | 1153.6324 |
| D       | 565.2729  | 1016.5735 |
| L       | 678.357   | 901.5465  |
| V       | 777.4254  | 788.4625  |
| L       | 890.5094  | 689.3941  |
| V       | 989.5778  | 576.31    |
| G       | 1046.5993 | 477.2416  |
| G       | 1103.6208 | 420.2201  |
| S       | 1190.6528 | 363.1987  |
| T       | 1291.7005 | 276.1666  |
| R       | 1447.8016 | 175.119   |

**AQIHDLVLVGGSTR**

Prec. MW: 1464.8053 /  $\Delta$  Mass: 0.0005

Frozen

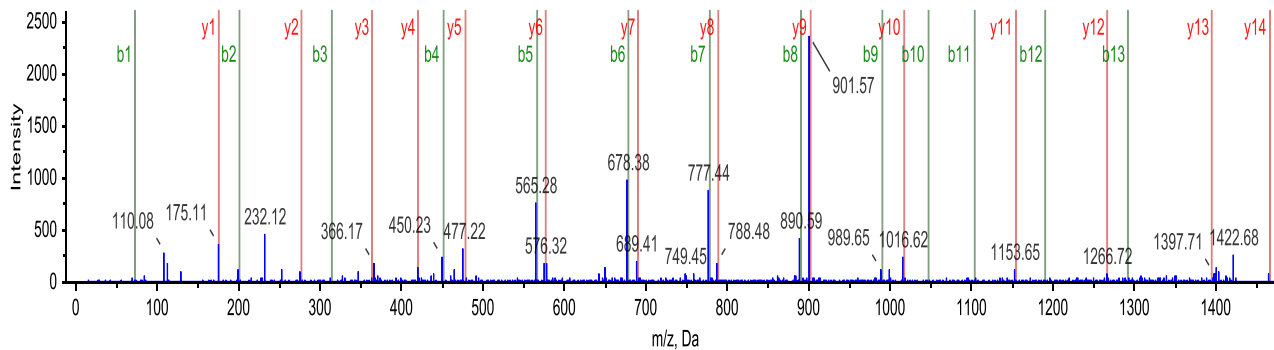

| Residue | b         | y         |
|---------|-----------|-----------|
| A       | 72.0444   | 1465.8122 |
| Q       | 200.103   | 1394.775  |
| I       | 313.187   | 1266.7165 |
| H       | 450.2459  | 1153.6324 |
| D       | 565.2729  | 1016.5735 |
| L       | 678.357   | 901.5465  |
| V       | 777.4254  | 788.4625  |
| L       | 890.5094  | 689.3941  |
| V       | 989.5778  | 576.31    |
| G       | 1046.5993 | 477.2416  |
| G       | 1103.6208 | 420.2201  |
| S       | 1190.6528 | 363.1987  |
| T       | 1291.7005 | 276.1666  |
| R       | 1447.8016 | 175.119   |

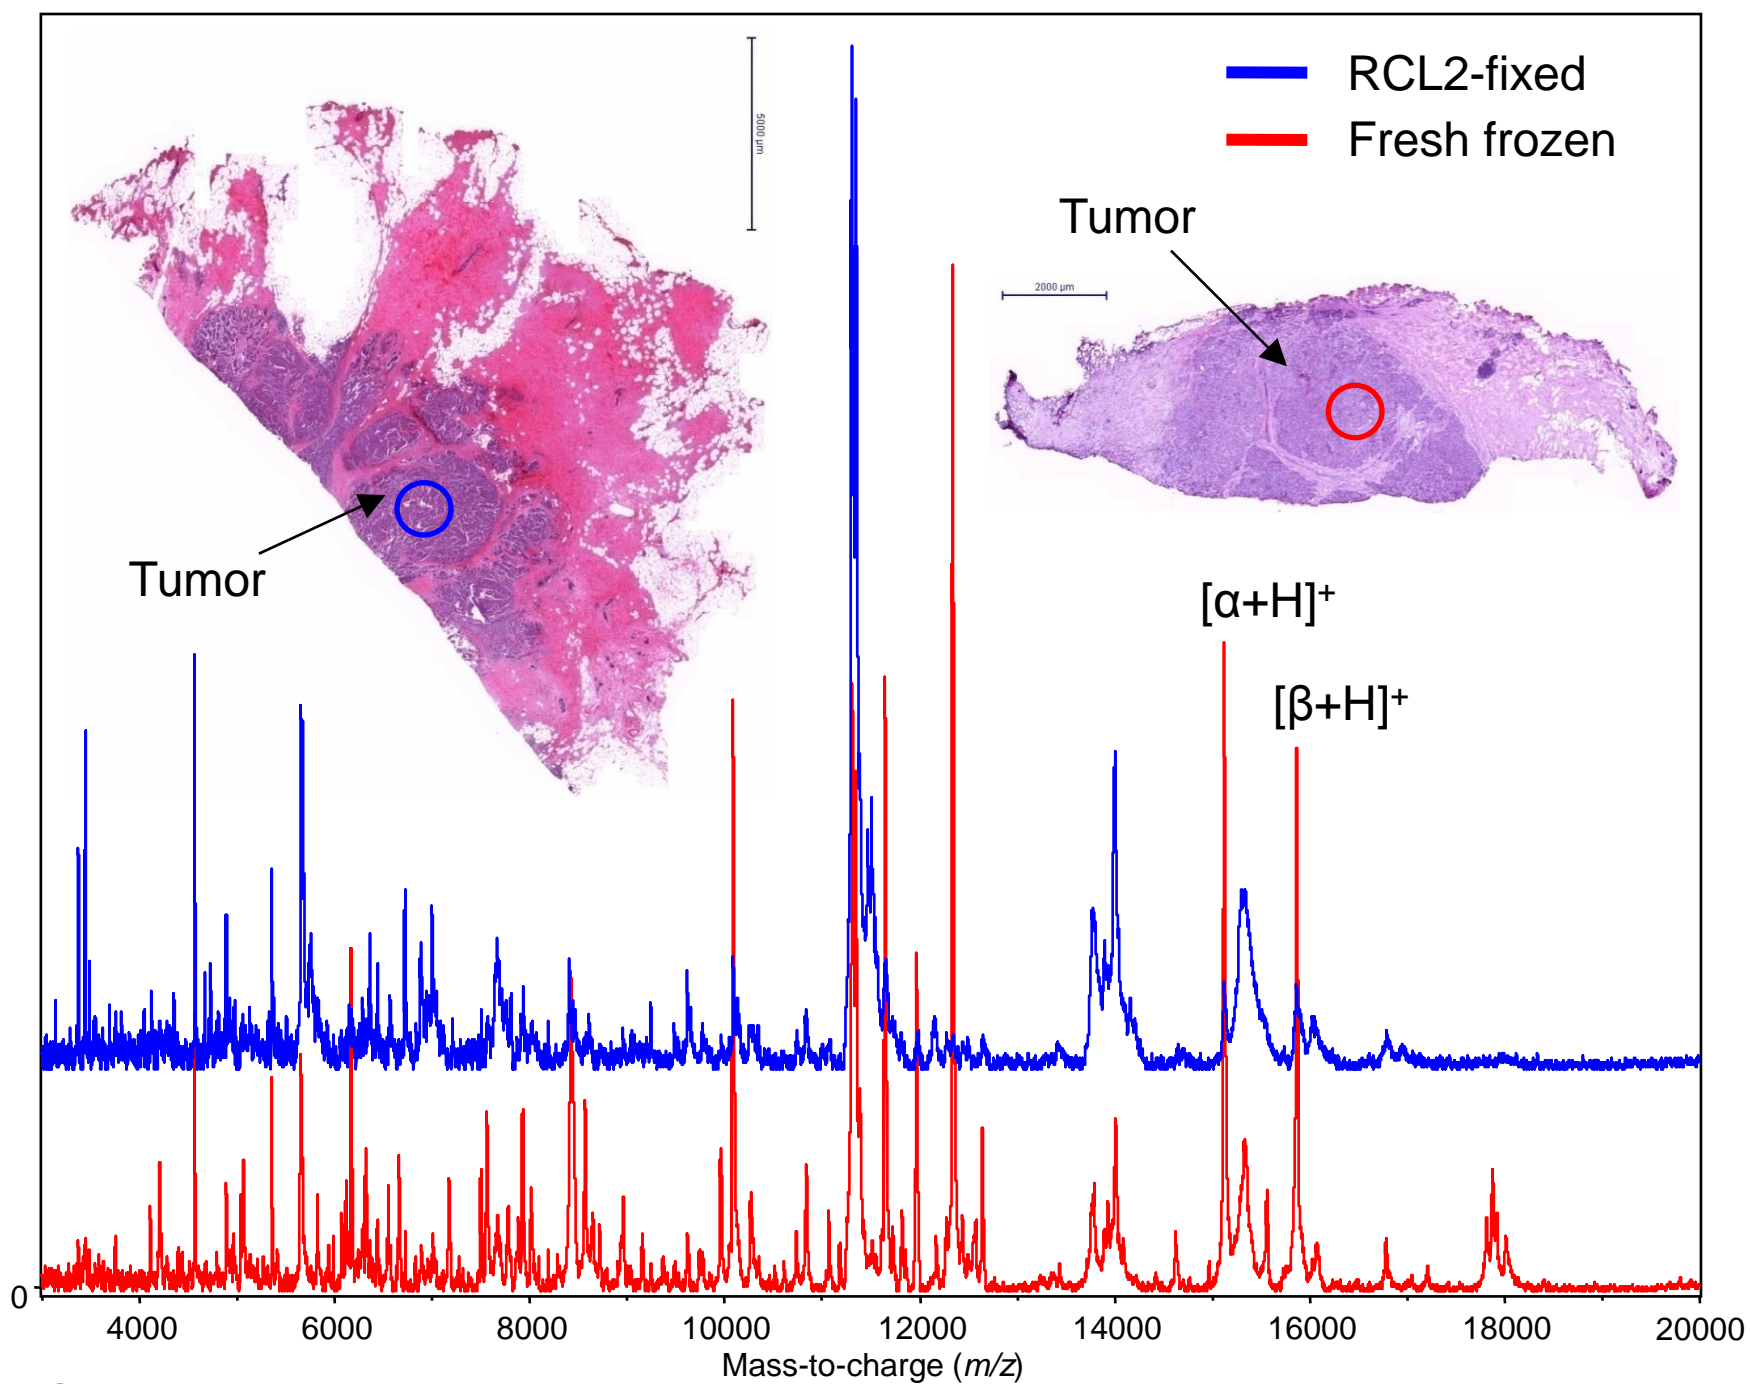

Supplemental Figure 2A

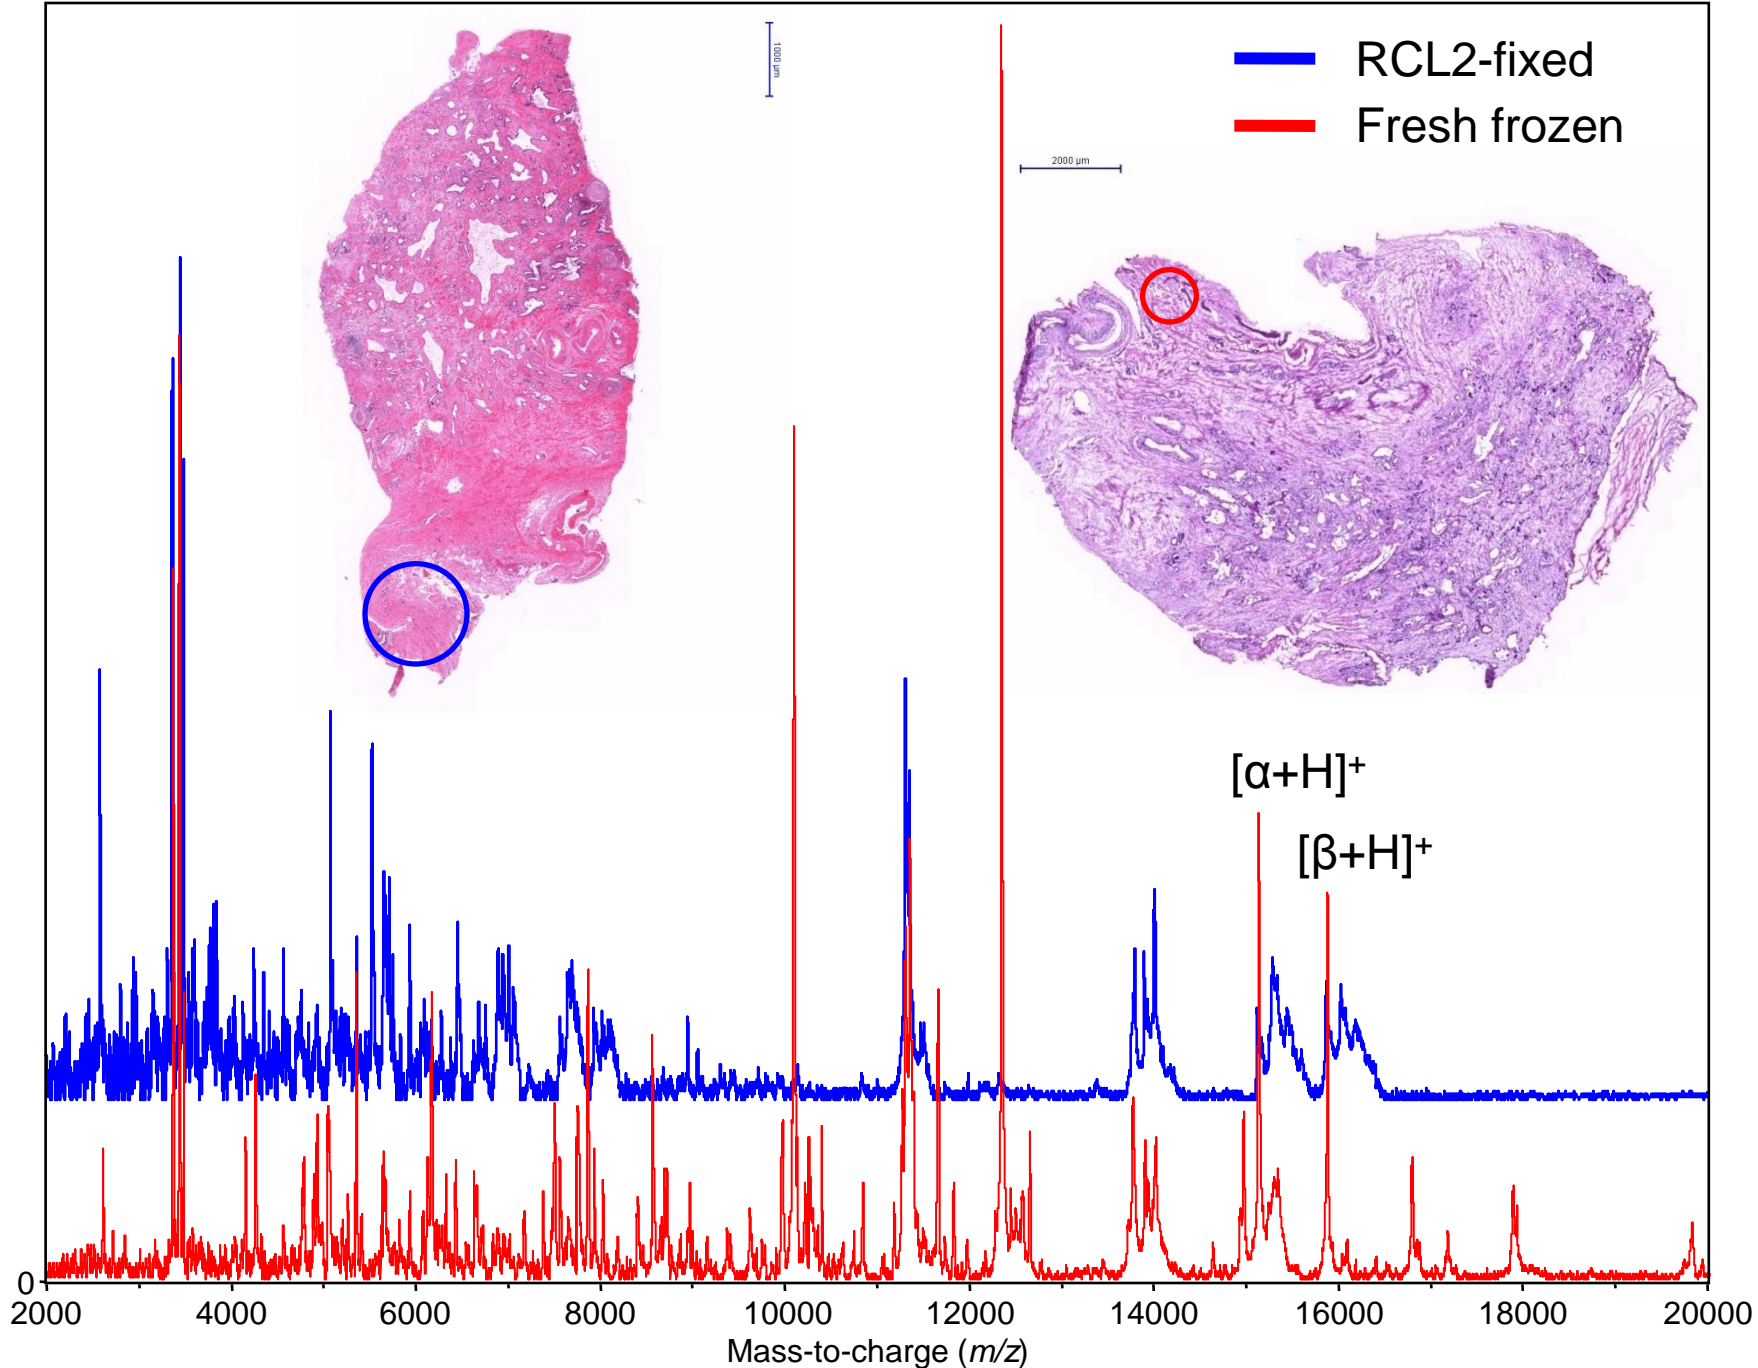

Supplemental Figure 2B
